# Supplementary material for: A fluoride-free siliceous STW-type zeolite synthesized using a designed organic structure-directing agent
Source: Royal Society of Chemistry journal article supplement (doi:10.1039/d2cc05850b), 2023-01-01
Supplement: d2cc05850b1.pdf [file d2cc05850b1.pdf]

## Supporting Information

### **A Fluoride-Free Siliceous STW-Type Zeolite Synthesized Using a Designed Organic Structure-Directing Agent**

Feng Jiao,<sup>[a]</sup> Jun Zhang,<sup>[b]</sup> Xianshu Cai,<sup>[a]</sup> Hao Li,<sup>[a]</sup> Yanan Xu,<sup>[a]</sup> Yue Zhao <sup>[a]</sup> and Hongbin Du\*<sup>[a]</sup>

<sup>a</sup> State Key Laboratory of Coordination Chemistry School of Chemistry and Chemical Engineering, Nanjing University, Nanjing, 210023 (China)

<sup>b</sup> School of Materials and Chemistry Engineering Anhui Jianzhu University, Hefei, 230601 (China)

E-mail: hbdu@nju.edu.cn

## Table of Contents

|                             |         |
|-----------------------------|---------|
| Experimental Procedures     | S3-S4   |
| Supplementary Figure S1-S14 | S4-S11  |
| Supplementary Table S1-S8   | S12-S17 |
| Supplementary References    | S18     |
| Author Contributions        | S18     |

## Experimental Procedures

### Materials Preparation

#### *Synthesis of OSDA(OH)*

15 mL (0.1208 mol) of 1,5-diazabicyclo[4.3.0]non-5-ene and 15 mL (0.2409 mol) of methyl iodide were added into MeCN (150 mL). The mixture was heated at 45°C for 12 h. The product was obtained by filtration, purified by recrystallization with water to give a white solid after dried overnight at 80°C (30.73 g, yield: 96%). The iodine forms of the OSDA were converted into the hydroxides by anion exchange. The concentration of the OSDA(OH) was obtained by titration with HCl.

#### *Synthesis of Si-STW-F*

In a typical synthesis, 2 mmol of tetraethylorthosilicate (TEOS) were added into the solution of OSDA(OH) (1 mmol), and then the mixture was stirred until the complete hydrolysis of TEOS. 1 mmol of HF were dosed into the solution under stirring for 1 h. The gel was dried at 80°C to evaporate excess water and ethanol until the theoretical quantity was reached. The final gel with a composition of 1 SiO<sub>2</sub> : 0.5 OSDA(OH) : 0.5 HF : 5 H<sub>2</sub>O was transferred into a 15-mL-Teflon-lined stainless-steel autoclave and heated at 160°C for 15 d. The products (denoted as Si-STW-F) were collected by filtrating, washing and drying in air. The products were calcined at 550°C in air for 5 h to remove OSDAF.

#### *Synthesis of Si-STW-OH*

In a typical synthesis, 2 mmol of tetraethylorthosilicate were added into the solution of OSDA(OH) (1 mmol), and then the mixture was stirred until the complete hydrolysis of TEOS. In the cases of seeded syntheses, 0.005 g of zeolite seeds were then added. The gel was dried at 80°C to evaporate excess water and ethanol until the theoretical quality was reached. The final gel with a composition of 1 SiO<sub>2</sub> : 0.5 OSDA(OH) : 5 H<sub>2</sub>O was transferred into a 15-mL-Teflon-lined stainless-steel autoclave and heated at 160°C for 40 d. The products (denoted as Si-STW-OH) were collected by centrifugation and drying in air. The products were calcined at 550°C in air for 5 h to remove OSDA(OH).

### Characterizations

Powder X-ray diffraction (PXRD) patterns were performed on a Bruker D8 Advance instrument with a CuK $\alpha$  radiation ( $\lambda = 1.54056 \text{ \AA}$ ) in the  $2\theta$  ranging from 5 to 50°. Scanning electron microscopy (SEM) images were collected on a field emission scanning electron microanalyzer (Hitachi S-4800). Thermogravimetric analyses (TGA) were carried out on a PerkinElmer thermal analyzer under a flowing air with a heating rate of 10 °C min<sup>-1</sup>. Chemical analysis of C, H, and N was carried out on an Elementar Vario MICRO cube. N<sub>2</sub> gas adsorption was performed on the Micrometrics ASAP 2020 surface-area porosimetry system at 77 K. Liquid-state <sup>13</sup>C nuclear magnetic resonance (NMR) spectra were performed on a Bruker DRX-400 spectrometer. The <sup>13</sup>C MAS NMR spectra were acquired on a Bruker Avance 600 MHz spectrometer with a 100.62 MHz resonance frequency. The <sup>29</sup>Si MAS NMR spectra were recorded on a Bruker Avance 600 MHz spectrometer with a resonance frequency of 79.49 Hz and the  $\pi/2$  pulse of 62.5 kHz. The <sup>19</sup>F MAS NMR spectra were recorded on a Bruker Avance 400 MHz spectrometer with a spinning rate of 14 kHz and pulse of 2.1 ms.

Single-crystal X-ray diffraction (SXRD) data was collected with a Bruker D8 Venture equipped with a Ga liquid-metal jet X-ray source (Excilum, Ga K $\alpha$  1.3414 Å). Data reduction and absorption corrections were performed by using the SAINT and SADABS programs,<sup>1, 2</sup> respectively. The structure was solved by using direct methods with the SHELEX-2018 program and refined with full-matrix least squares on F<sup>2</sup> by using the SHELEX-2018 program.<sup>3</sup> Deposition number 2211902 (for Si-STW-F) contains the supplementary crystallographic data for this paper. These data are provided free of charge by the joint Cambridge Crystallographic Data Centre and Fachinformationszentrum Karlsruhe Access Structures service.

### Calculation methods

Theoretical calculations were performed to study the stabilization energies between the OSDAs and STW zeolite framework based on the DFT+D theory using the plane wave approaches implemented in CASTEP package.<sup>4</sup> The geometries of zeolites MDBN-Si-STW-F and ETMI-Si-STW-F<sup>5</sup> (space group P6<sub>1</sub>) were taken from single crystal X-ray diffraction analyses. The P6<sub>1</sub> structure model for PMI-Si-STW-F was built manually in a similar manner by substitution of the OSDA cations from MDBN-Si-STW-F while the cell parameters were kept with the single crystal structure data of P6<sub>5</sub>-symmetry PMI-Si-STW-F.<sup>5</sup> The geometry optimizations with fixed cell parameters were carried out with the generalized gradient approximation (GGA) method and the

Perdew-Burke-Ernzerhof (PBE)<sup>6</sup> as exchange-correlation functional. The dispersion correction scheme by Grimme (G06) was employed to account for the weak interactions.<sup>7, 8</sup> The periodic boundary conditions were employed to model the systems. The Brillouin zone was sampled by a  $k$ -point mesh of  $1 \times 1 \times 1$ . An energy cutoff of 571.4 eV for the plane-wave basis set was used during the calculations. The self-consistent field (SCF) calculations were converged at  $1 \times 10^{-6}$  eV per atom. The convergence conditions for the optimization calculations were set with the energy change between two consecutive steps lower than  $1 \times 10^{-5}$  eV, and a maximum force allowed lower than 0.03 eV/Å on each atom. The interaction energy ( $E_{\text{interaction}}$ ) of OSDA was defined as:

$$E_{\text{interaction}} = (E_{\text{OSDAF@zeolite}} - E_{\text{zeolite}} - nE_{\text{OSDA}} - nE_{\text{F}}) / nN_{\text{T}} \quad (1)$$

where  $E_{\text{OSDAF@zeolite}}$  was the total energy of zeolite embedded with OSDAF,  $E_{\text{zeolite}}$  was the energy of empty zeolite,  $E_{\text{OSDA}}$  was the energy of the OSDA cation,  $E_{\text{OSDA}}$  was the energy of the  $\text{F}^-$  anion,  $n$  is the number of OSDAF in zeolite, and  $N_{\text{T}}$  is the number of T sites in zeolite, respectively. In the unit cell of STW,  $n = 6$  and  $N_{\text{T}} = 60$ .

Further studies on intermolecular interactions between the OSDAs and the zeolite framework were performed with softwares Multiwfn<sup>9-11</sup> and CP2K.<sup>12, 13</sup> The electron densities of the optimized OSDA-Si-STW-F were obtained with the GGA PBE method implemented in CP2K-2022.1 package using the molecularly optimized basis set DZVP-MOLOPT-SR-GTH and a Goedecker-Teter-Hutter (GTH) pseudopotential.<sup>14-16</sup> The dispersion correction scheme by Grimme (DFT-D3(BJ)) was employed to account for the weak interactions.<sup>7, 8</sup> An energy cutoff of 600 Ry and 60 Ry for the plane-wave and Gaussians mapping, respectively, was used during the calculations. The self-consistent field (SCF) calculations were converged at  $1 \times 10^{-6}$  Hartree. The electron density analyses such as electrostatic potential coloured van der Waals surface and independent gradient model on Hirshfeld partition of electron density were performed on Multiwfn and the results were visualized by VMD<sup>17</sup> and VESTA.<sup>18</sup>

## Supplementary Figures

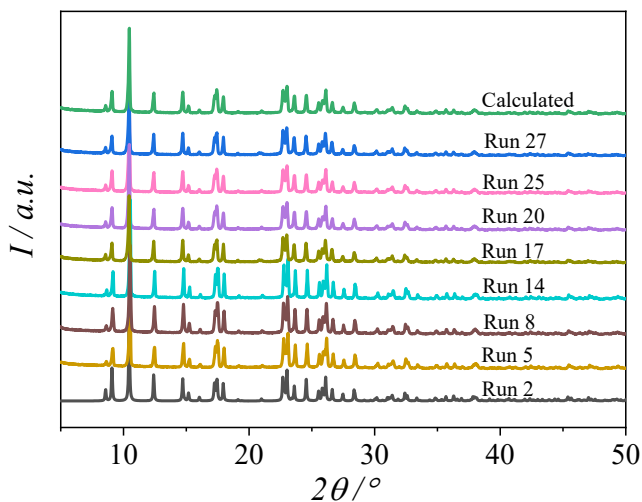

**Figure S1.** PXRD patterns of Si-STW-F synthesized under different synthesis conditions, compared to the calculated one based on the single crystal diffraction data of Si-STW-F.

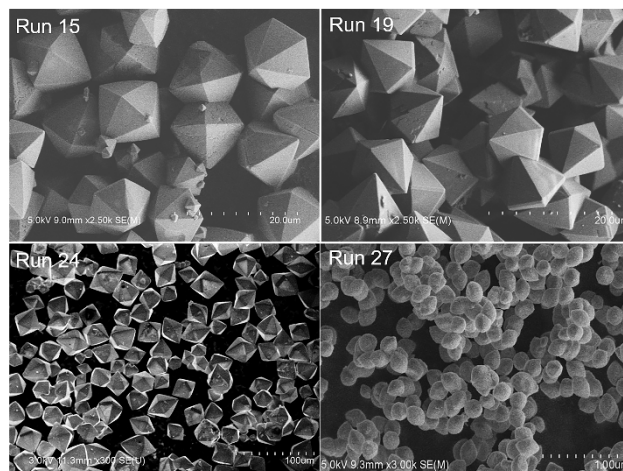

**Figure S2.** SEM images of Si-STW-F prepared under different synthesis conditions.

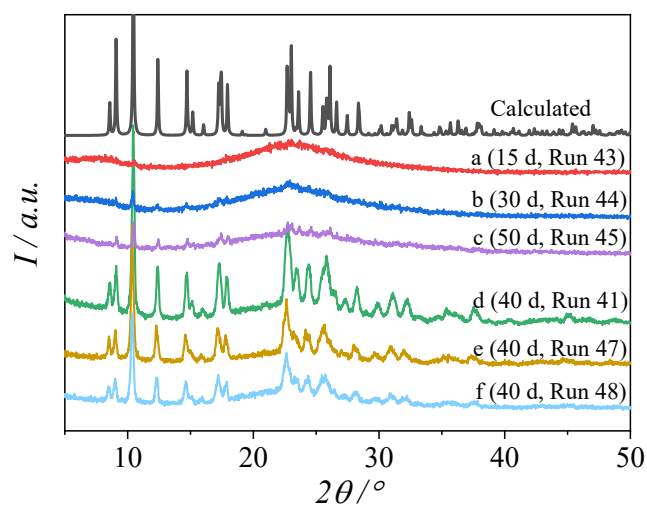

**Figure S3.** PXRD patterns of as-synthesized Si-STW-OH: (a, b, and c) without seeds, (d) with F-containing seeds, (e, f) with F-free seeds. The calculated one based on the single crystal diffraction data of Si-STW-F is shown for comparison.

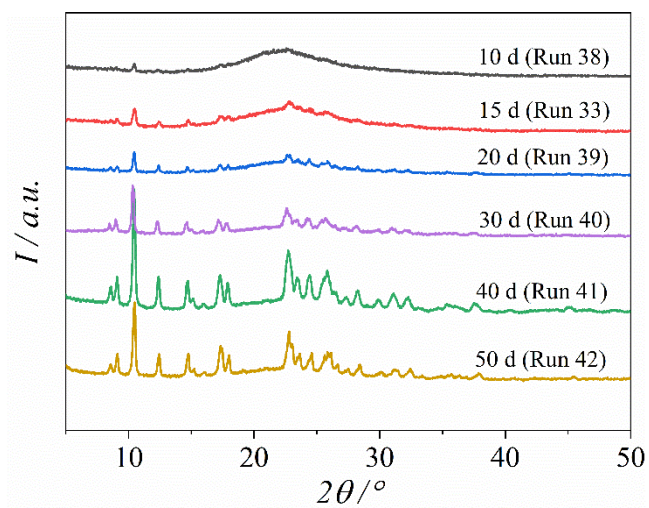

**Figure S4.** PXRD patterns of Si-STW-OH with seeded syntheses at different synthesis time. All peaks are assigned to STW.

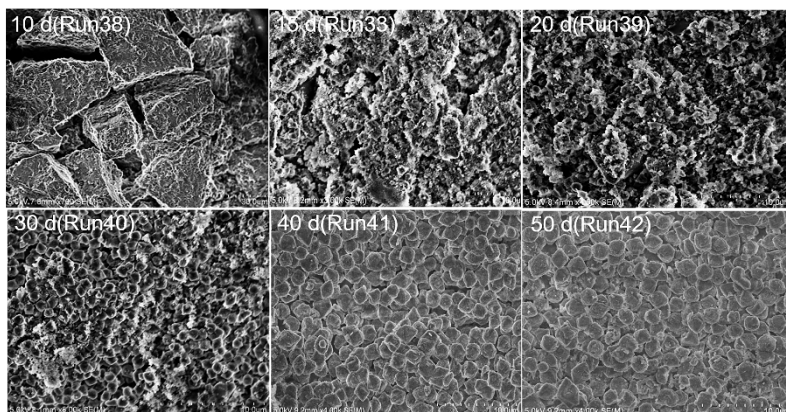

**Figure S5.** SEM images of Si-STW-OH synthesized with different synthesis time.

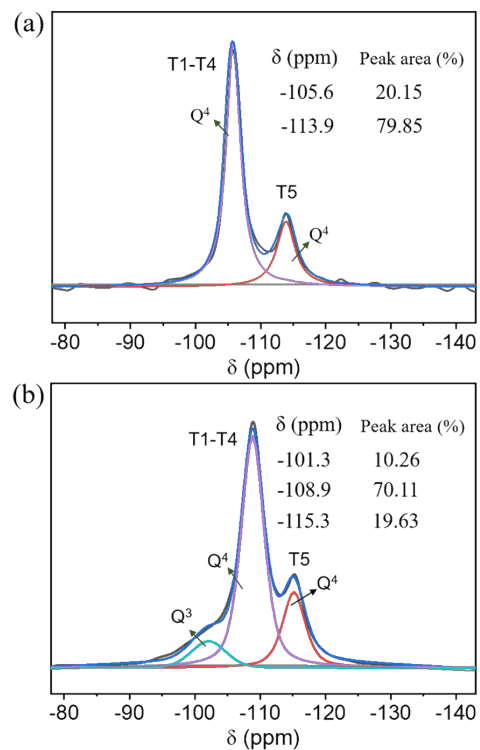

**Figure S6.** <sup>29</sup>Si MAS NMR spectra of as-made (a) Si-STW-F and (b) Si-STW-OH.

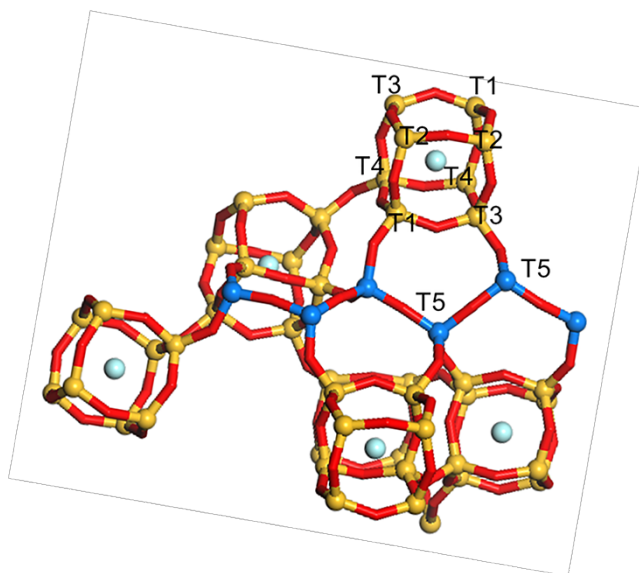

**Figure S7.** Five crystallographically-independent Si atoms in Si-STW-F: T1–T4 atoms (yellow colored) are involved in the D4R unit, and T5 atoms (blue colored) form chains to connect D4R units in STW-type framework.

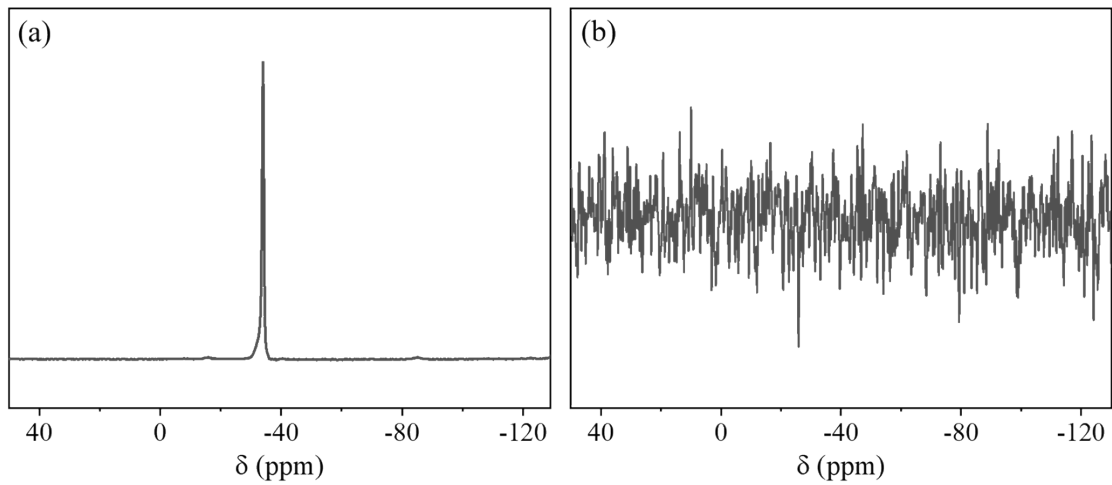

Figure S8.  $^{19}\text{F}$  NMR spectrum of (a) Si-STW-F and (b) Si-STW-OH.

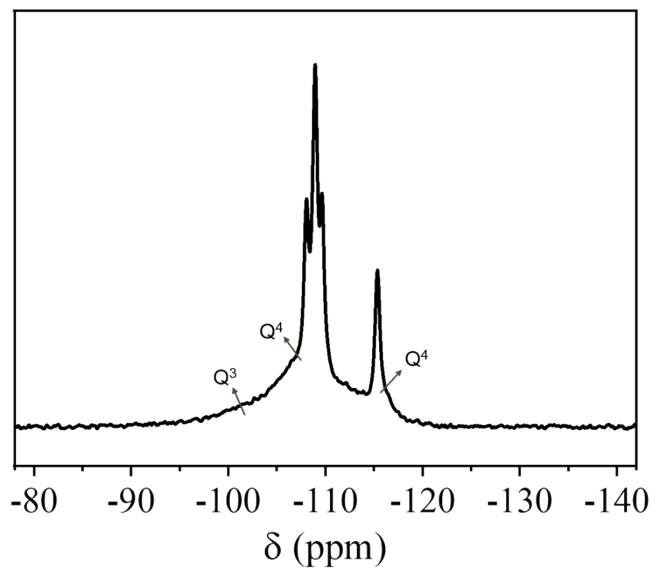

Figure S9.  $^{29}\text{Si}$  MAS NMR spectra of Si-STW-OH after calcination.



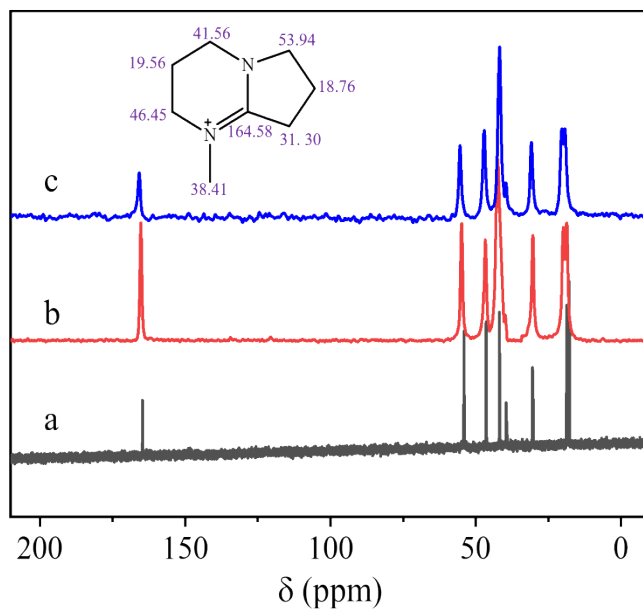

**Figure S10.** (a)  $^{13}\text{C}$  NMR spectra of MDBN in  $\text{D}_2\text{O}$ , and solid state  $^{13}\text{C}$  MAS NMR spectra of (b) Si-STW-F and (c) Si-STW-OH.

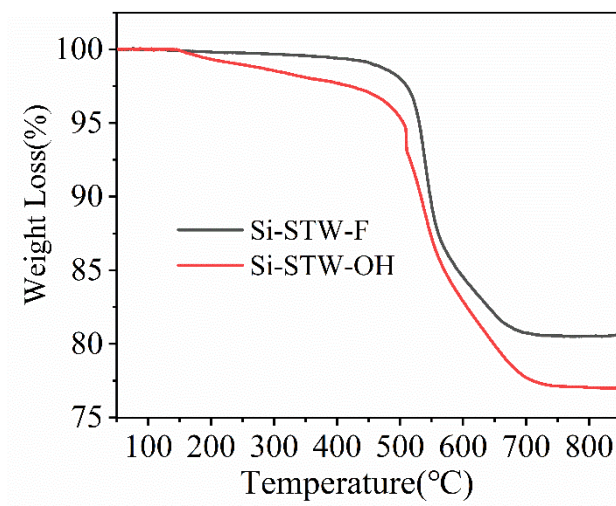

**Figure S11.** TGA curves of Si-STW-F and Si-STW-OH.

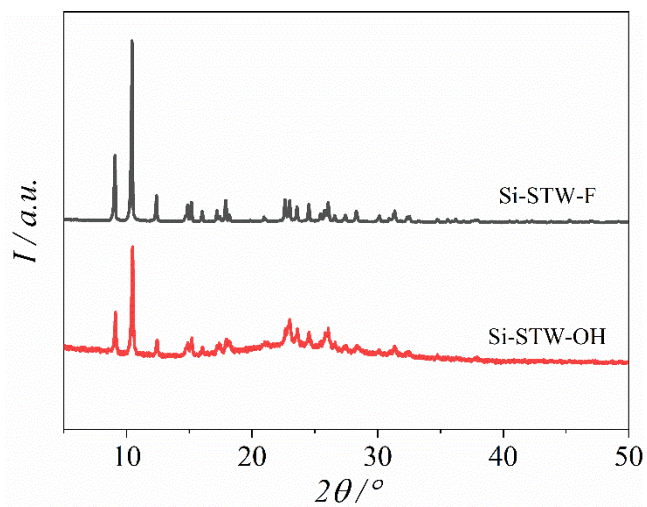

**Figure S12.** PXRD patterns of calcined Si-STW-F and Si-STW-OH.

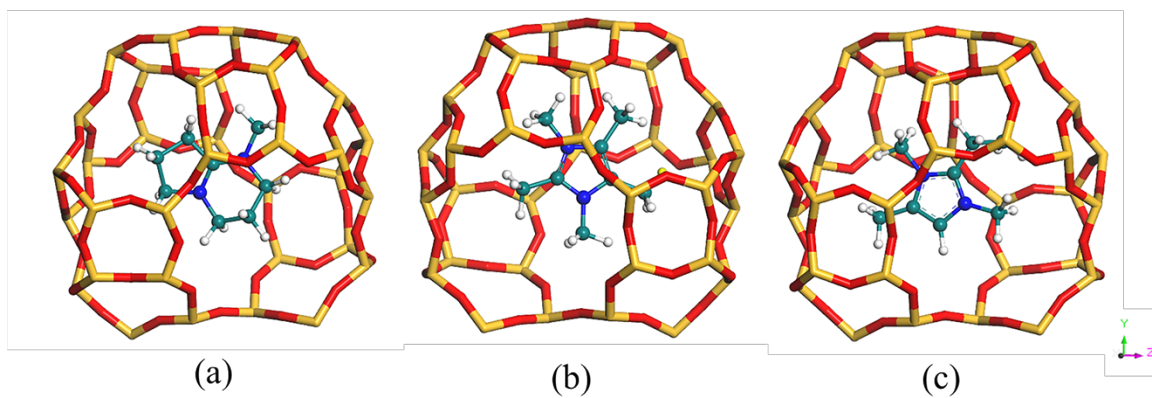

**Figure S13.** Arrangements of OSDAs in the  $[4^6 5^8 8^2 10^2]$  cage of Si-STW-F: (a) MBDN, (b) PMI and (c) ETMI,<sup>[4]</sup> determined by SXRD. Only one possible configuration is shown. Yellow, Si; red, O; cyan, C; white-grey, H; blue, N.

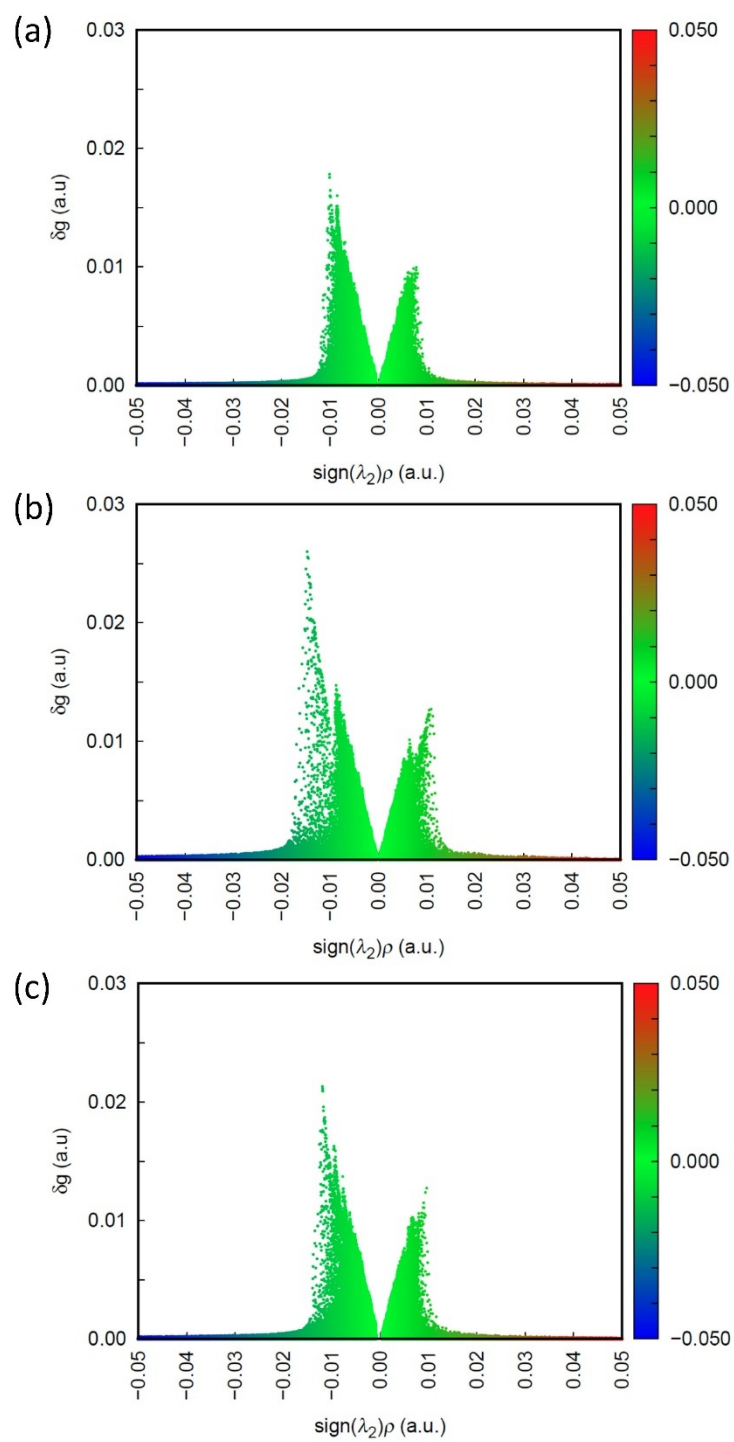

**Figure S14.** Scatter plots of  $\delta_{g_{inter}}$  vs  $\text{sign}(\lambda_2)\rho$  for (a) MDBN, (b) PMI and (c) ETMI in STW cage, showing intermolecular interactions between the OSDA and the cage. The colour mapping function,  $\text{sign}(\lambda_2)\rho$ , indicates whether the interaction is attractive (negative) or repulsive (positive).

## Supplementary Tables

**Table S1.** Synthesis survey for Si-STW-F.

| Run | SDA/Si | HF/Si | H <sub>2</sub> O/Si | Seed (wt% <sup>[a]</sup> ) | Temperature (°C) | Time (d) | Phase <sup>[b]</sup> |
|-----|--------|-------|---------------------|----------------------------|------------------|----------|----------------------|
| 1   | 1      | 1     | 3                   | 0                          | 160              | 15       | STW                  |
| 2   | 1      | 1     | 5                   | 0                          | 160              | 15       | STW                  |
| 3   | 1      | 1     | 10                  | 0                          | 160              | 15       | STW                  |
| 4   | 0.5    | 0.5   | 3                   | 0                          | 160              | 15       | STW                  |
| 5   | 0.5    | 0.5   | 5                   | 0                          | 160              | 15       | STW                  |
| 6   | 0.5    | 0.5   | 10                  | 0                          | 160              | 15       | STW                  |
| 7   | 0.3    | 0.3   | 3                   | 0                          | 160              | 15       | STW                  |
| 8   | 0.3    | 0.3   | 5                   | 0                          | 160              | 15       | STW                  |
| 9   | 0.3    | 0.3   | 10                  | 0                          | 160              | 15       | Am + STW             |
| 10  | 0.1    | 0.1   | 3                   | 0                          | 160              | 15       | Am                   |
| 11  | 0.1    | 0.1   | 5                   | 0                          | 160              | 15       | Am                   |
| 12  | 0.1    | 0.1   | 10                  | 0                          | 160              | 15       | Am                   |
| 13  | 0.5    | 0.3   | 3                   | 0                          | 160              | 15       | STW                  |
| 14  | 0.5    | 0.3   | 5                   | 0                          | 160              | 15       | STW                  |
| 15  | 0.5    | 0.3   | 10                  | 0                          | 160              | 15       | STW                  |
| 16  | 0.5    | 0.1   | 3                   | 0                          | 160              | 15       | STW                  |
| 17  | 0.5    | 0.1   | 5                   | 0                          | 160              | 15       | STW                  |
| 18  | 0.5    | 0.1   | 10                  | 0                          | 160              | 15       | STW                  |
| 19  | 0.5    | 0.5   | 20                  | 0                          | 160              | 15       | STW                  |
| 20  | 0.5    | 0.5   | 30                  | 0                          | 160              | 15       | STW                  |
| 21  | 0.5    | 0.5   | 40                  | 0                          | 160              | 15       | Am + STW             |
| 22  | 0.5    | 0.5   | 5                   | 0                          | 160              | 5        | Am                   |
| 23  | 0.5    | 0.5   | 5                   | 0                          | 160              | 10       | Am + STW             |
| 24  | 0.5    | 0.5   | 5                   | 0                          | 160              | 20       | STW                  |
| 25  | 0.5    | 0.5   | 5                   | 0                          | 160              | 30       | STW                  |
| 26  | 0.5    | 0.5   | 3                   | 1                          | 160              | 15       | STW                  |
| 27  | 0.5    | 0.5   | 5                   | 1                          | 160              | 15       | STW                  |
| 28  | 0.5    | 0.5   | 10                  | 1                          | 160              | 15       | STW                  |

[a] Percentage of theoretical mass of the gel (i.e. the sum mass of SiO<sub>2</sub>, OSDAF, and H<sub>2</sub>O).

[b] Am: amorphous.

**Table S2.** Synthesis survey for Si-STW-OH.

| Run | SDA/Si | HF/Si | H <sub>2</sub> O/Si | Seed (wt% <sup>[a]</sup> ) | Temperature (°C) | Time (d) | Phase <sup>[b]</sup> |
|-----|--------|-------|---------------------|----------------------------|------------------|----------|----------------------|
| 29  | 0.3    | 0     | 3                   | 1                          | 160              | 15       | Am                   |
| 30  | 0.3    | 0     | 5                   | 1                          | 160              | 15       | Am + STW             |
| 31  | 0.3    | 0     | 10                  | 1                          | 160              | 15       | Am + STW             |
| 32  | 0.5    | 0     | 3                   | 1                          | 160              | 15       | Am + STW             |
| 33  | 0.5    | 0     | 5                   | 1                          | 160              | 15       | Am + STW             |
| 34  | 0.5    | 0     | 10                  | 1                          | 160              | 15       | Am + STW             |
| 35  | 0.8    | 0     | 3                   | 1                          | 160              | 15       | Am                   |
| 36  | 0.8    | 0     | 5                   | 1                          | 160              | 15       | Am                   |
| 37  | 0.8    | 0     | 10                  | 1                          | 160              | 15       | Am + STW             |
| 38  | 0.5    | 0     | 5                   | 1                          | 160              | 10       | Am                   |
| 39  | 0.5    | 0     | 5                   | 1                          | 160              | 20       | Am + STW             |
| 40  | 0.5    | 0     | 5                   | 1                          | 160              | 30       | STW                  |
| 41  | 0.5    | 0     | 5                   | 1                          | 160              | 40       | STW                  |
| 42  | 0.5    | 0     | 5                   | 1                          | 160              | 50       | STW                  |
| 43  | 0.5    | 0     | 5                   | 0                          | 160              | 15       | Am + STW             |
| 44  | 0.5    | 0     | 5                   | 0                          | 160              | 30       | Am + STW             |
| 45  | 0.5    | 0     | 5                   | 0                          | 160              | 50       | Am + STW             |
| 46  | 0.5    | 0     | 5                   | 1 <sup>[d]</sup>           | 160              | 30       | Am + STW             |
| 47  | 0.5    | 0     | 5                   | 1 <sup>[d]</sup>           | 160              | 40       | STW                  |
| 48  | 0.5    | 0     | 5                   | 1 <sup>[e]</sup>           | 160              | 40       | STW                  |
| 49  | 0.5    | 0     | 5                   | 1 <sup>[f]</sup>           | 160              | 40       | STW                  |

[a] All seeds were calcined unless otherwise stated.

[b] Percentage of theoretical mass of gel.

[c] Am: amorphous.

[d] Product from Run 41 pure-silica STW used as seeds.

[e] Product from Run 47 pure-silica STW used as seeds.

[f] Product from Run 41 pure-silica STW used as seeds without calcination.

**Table S3.** Averaged Si-O-Si angles (°) in as-made Si-STW-F and calcined Si-STW HPM-1.

|                                 | T1    | T2    | T3    | T4    | T5    |
|---------------------------------|-------|-------|-------|-------|-------|
| As-made Si-STW-F <sup>[a]</sup> | 139.3 | 140.3 | 141.3 | 141.7 | 155.0 |
| Calcined HPM-1 <sup>[b]</sup>   | 146.8 | 146.4 | 147.8 | 148.2 | 156.3 |

[a] From single crystal X-ray diffraction analyses.

[b] From Rietveld refinement. <sup>19</sup>

**Table S4.** Elemental analysis data for Si-STW-F and Si-STW-OH.

| samples   | C (wt%) | N (wt%) | H (wt%) | C/N <sup>[a]</sup> | H/N <sup>[a]</sup> | H/C <sup>[a]</sup> |
|-----------|---------|---------|---------|--------------------|--------------------|--------------------|
| Si-STW-F  | 12.27   | 3.47    | 1.94    | 4.13 (4.0)         | 7.83 (7.5)         | 1.90 (1.9)         |
| Si-STW-OH | 10.69   | 3.15    | 2.12    | 3.96 (4.0)         | 9.42 (8.0)         | 2.38 (2.0)         |

[a] Molar ratios. Theoretical values of MDBN(F) and MDBN(OH) are given in parentheses.

**Table S5.** Texture properties of calcined Si-STW-F and Si-STW-OH.

| Samples                                     | Si-STW-F | Si-STW-OH |
|---------------------------------------------|----------|-----------|
| BET surface area, m <sup>2</sup> /g         | 529      | 496       |
| Micropore surface area, m <sup>2</sup> /g   | 486      | 440       |
| External surface area, m <sup>2</sup> /g    | 43       | 56        |
| t-Plot micropore volume, cm <sup>3</sup> /g | 0.172    | 0.134     |
| Total pore volume, cm <sup>3</sup> /g       | 0.223    | 0.201     |

**Table S6.** Crystallographic and structural data of Si-STW-F.

|                                                                                                        |                                                                                    |
|--------------------------------------------------------------------------------------------------------|------------------------------------------------------------------------------------|
| Compound reference                                                                                     | Si-STW-F                                                                           |
| Empirical formula                                                                                      | Si <sub>10</sub> O <sub>20</sub> (C <sub>8</sub> H <sub>15</sub> N <sub>2</sub> F) |
| Formula weight                                                                                         | 759.12                                                                             |
| Temperature/K                                                                                          | 210                                                                                |
| Crystal system                                                                                         | Hexagonal                                                                          |
| Space group                                                                                            | <i>P</i> 6 <sub>1</sub> 22                                                         |
| <i>a</i> /Å                                                                                            | 11.8995(9)                                                                         |
| <i>b</i> /Å                                                                                            | 11.8995(9)                                                                         |
| <i>c</i> /Å                                                                                            | 29.636(4)                                                                          |
| $\alpha$ /°                                                                                            | 90                                                                                 |
| $\beta$ /°                                                                                             | 90                                                                                 |
| $\gamma$ /°                                                                                            | 120                                                                                |
| Unit cell volume/Å <sup>3</sup>                                                                        | 3634.2(7)                                                                          |
| <i>Z</i>                                                                                               | 6                                                                                  |
| Crystal size/mm <sup>3</sup>                                                                           | 0.05 × 0.05 × 0.04                                                                 |
| 2 $\theta$ range for data collection/°                                                                 | 3.732 to 53.889                                                                    |
| No. of reflections collected                                                                           | 18960                                                                              |
| No. of independent reflections                                                                         | 2484                                                                               |
| <i>R</i> <sub>int</sub>                                                                                | 0.0953                                                                             |
| <i>R</i> <sub>sigma</sub>                                                                              | 0.1728                                                                             |
| Final <i>R</i> <sub>1</sub> values ( <i>I</i> > 2 $\sigma$ ( <i>I</i> )) <sup>[a]</sup>                | 0.0516                                                                             |
| Final w <i>R</i> ( <i>F</i> <sup>2</sup> ) values ( <i>I</i> > 2 $\sigma$ ( <i>I</i> )) <sup>[a]</sup> | 0.1211                                                                             |
| Final <i>R</i> <sub>1</sub> values (all data) <sup>[a]</sup>                                           | 0.0758                                                                             |
| Final w <i>R</i> ( <i>F</i> <sup>2</sup> ) values (all data) <sup>[a]</sup>                            | 0.1305                                                                             |
| Goodness of fit on <i>F</i> <sup>2</sup>                                                               | 1.057                                                                              |
| CCDC                                                                                                   | 2211902                                                                            |

[a]  $R_1 = \sum ||F_o| - |F_c|| / \sum |F_o|$ ,  $wR = [\sum w(F_o^2 - F_c^2)^2 / \sum w(F_o^2)^2]^{1/2}$

**Table S7.** Atomic coordinates and isotropic thermal parameters of Si-STW-F.

| Atom | x            | y           | z           | U(eq)      | Occupancy |
|------|--------------|-------------|-------------|------------|-----------|
| Si1  | -0.0872(2)   | 0.6625(2)   | 0.54846(7)  | 0.0248(5)  | 1         |
| Si2  | 0.1159(2)    | 0.5306(2)   | 0.63365(7)  | 0.0260(5)  | 1         |
| Si3  | -0.0955(2)   | 0.6032(2)   | 0.64816(7)  | 0.0257(5)  | 1         |
| Si4  | -0.2989(2)   | 0.3778(2)   | 0.53346(7)  | 0.0261(5)  | 1         |
| Si5  | -0.03011(19) | 0.84784(19) | 0.69966(6)  | 0.0207(5)  | 1         |
| O1   | 0.0454(5)    | 0.6714(5)   | 0.53124(18) | 0.0293(13) | 1         |
| O2   | -0.2139(5)   | 0.5337(5)   | 0.53001(18) | 0.0329(13) | 1         |
| O3   | -0.0911(5)   | 0.6775(5)   | 0.60221(16) | 0.0297(13) | 1         |
| O4   | 0.0291(5)    | 0.5871(5)   | 0.65442(17) | 0.0328(13) | 1         |
| O5   | 0.1699(7)    | 0.5849(3)   | 0.583333    | 0.0304(18) | 1         |
| O6   | 0.2390(5)    | 0.5776(5)   | 0.66711(18) | 0.0280(11) | 1         |
| O7   | -0.2288(5)   | 0.4671(5)   | 0.3704(4)   | 0.0301(13) | 1         |
| O8   | -0.0970(5)   | 0.6961(5)   | 0.68785(16) | 0.0262(12) | 1         |
| O9   | 0.1249(5)    | 0.9137(5)   | 0.69421(16) | 0.0253(12) | 1         |
| O10  | -0.0690(3)   | 0.8620(7)   | 0.75        | 0.0252(16) | 1         |
| O11  | -0.0779(6)   | 0.9221(6)   | 0.666667    | 0.0257(16) | 1         |
| O12  | -0.3571(7)   | 0.3214(4)   | 0.583333    | 0.0317(18) | 1         |
| C1   | -0.452(3)    | 0.581(2)    | 0.6076(10)  | 0.099(8)   | 0.5       |
| C2   | -0.656(3)    | 0.359(2)    | 0.5992(7)   | 0.089(7)   | 0.5       |
| C3   | -0.738(3)    | 0.2316(18)  | 0.6221(7)   | 0.097(6)   | 0.5       |
| C4   | -0.7758(16)  | 0.245(2)    | 0.6692(7)   | 0.074(5)   | 0.5       |
| C5   | -0.560(5)    | 0.447(5)    | 0.6677(11)  | 0.077(6)   | 0.5       |
| C6   | -0.449(2)    | 0.530(2)    | 0.6989(8)   | 0.097(7)   | 0.5       |
| C7   | -0.479(2)    | 0.451(3)    | 0.7420(7)   | 0.103(7)   | 0.5       |
| C8   | -0.616(2)    | 0.336(3)    | 0.7392(6)   | 0.088(7)   | 0.5       |
| N1   | -0.557(2)    | 0.458(2)    | 0.6279(7)   | 0.086(5)   | 0.5       |
| N2   | -0.6553(15)  | 0.3351(16)  | 0.6909(6)   | 0.080(4)   | 0.5       |
| F1   | -0.0953(8)   | 0.4524(4)   | 0.583333    | 0.055(2)   | 1         |



**Table S8.** Selected interatomic distances (Å) and bond angles (°) of Si-STW-F.

---

| Distances   |          |             |          |            |          |             |           |
|-------------|----------|-------------|----------|------------|----------|-------------|-----------|
| Si1-O1      | 1.611(5) | Si1-O2      | 1.615(6) | Si1-O3     | 1.606(5) | Si1-O9      | 1.620(5)  |
| Si2-O1      | 1.618(5) | Si2-O4      | 1.610(6) | Si2-O5     | 1.625(3) | Si2-O6      | 1.620(5)  |
| Si3-O3      | 1.610(5) | Si3-O4      | 1.597(6) | Si3-O7     | 1.613(5) | Si3-O8      | 1.621(5)  |
| Si4-O2      | 1.612(5) | Si4-O6      | 1.628(5) | Si4-O7     | 1.604(5) | Si4-O16     | 1.628(3)  |
| Si5-O8      | 1.606(5) | Si5-O9      | 1.612(5) | Si5-O10    | 1.596(2) | Si5-O11     | 1.601(2)  |
| Angles      |          |             |          |            |          |             |           |
| O1-Si1-O2   | 111.9(3) | O1-Si1-O9   | 105.4(3) | O2-Si1-O9  | 108.8(3) | O3-Si1-O1   | 112.8(3)  |
| O3-Si1-O2   | 112.1(3) | O3-Si1-O9   | 105.3(3) | O1-Si2-O5  | 111.3(2) | O1-Si2-O6   | 103.7(3)  |
| O4-Si2-O1   | 113.4(3) | O4-Si2-O5   | 113.2(3) | O4-Si2-O6  | 106.3(3) | O6-Si2-O5   | 108.4(3)  |
| O3-Si3-O7   | 112.8(3) | O3-Si3-O8   | 104.3(3) | O4-Si3-O3  | 112.8(3) | O4-Si3-O7   | 111.9(3)  |
| O4-Si3-O8   | 109.0(3) | O7-Si3-O8   | 105.5(3) | O2-Si4-O6  | 104.4(3) | O2-Si4-O16  | 115.1(2)  |
| O6-Si4-O16  | 106.9(3) | O7-Si4-O2   | 114.0(3) | O7-Si4-O6  | 104.7(3) | O7-Si4-O16  | 110.7(2)  |
| O8-Si5-O9   | 109.2(3) | O10-Si5-O8  | 108.4(3) | O10-Si5-O9 | 111.4(2) | O10-Si5-O11 | 108.12(1) |
| O11-Si5-O8  | 112.0(3) | O11-Si5-O9  | 107.9(3) | Si1-O1-Si2 | 138.5(3) | Si4-O2-Si1  | 145.2(4)  |
| Si1-O3-Si3  | 140.6(3) | Si3-O4-Si2  | 146.4(4) | Si2-O5-Si2 | 140.0(5) | Si2-O6-Si4  | 136.3(3)  |
| Si4-O7-Si3  | 139.1(4) | Si4-O16-Si4 | 136.7(5) | Si5-O8-Si3 | 139.2(3) | Si5-O9-Si1  | 142.4(3)  |
| Si5-O10-Si5 | 169.5(5) | Si5-O11-Si5 | 168.7(5) |            |          |             |           |

---

## Supplementary References

- 1 Bruker XPREP (Version 2014/2) and SADABS (Version 2014/4). Bruker AXS Inc., Madison, Wisconsin, USA.
- 2 L. Krause, R. Herbst-Irmer, G. M. Sheldrick and D. Stalke, *J Appl Crystallogr* 2015, **48**, 3-10.
- 3 G. M. Sheldrick, *Acta Crystallogr C Struct Chem* 2015, **71**, 3-8.
- 4 S. J. Clark, M. D. Segall, C. J. Pickard, P. J. Hasnip, M. J. Probert, K. Refson and M. C. Payne, *Z. Krist.* 2005, **220**, 567-570.
- 5 J. H. Kang, L. B. McCusker, M. W. Deem, C. Baerlocher and M. E. Davis, *Chem. Mater.* 2021, **33**, 1752-1759.
- 6 J. P. Perdew, K. Burke and M. Ernzerhof, *Phys. Rev. Lett.* 1996, **77**, 3865-3868.
- 7 S. Grimme, S. Ehrlich and L. Goerigk, *J. Comput. Chem.* 2011, **32**, 1456-1465.
- 8 S. Grimme, J. Antony, S. Ehrlich and H. Krieg, *J. Chem. Phys.* 2010, **132**, 154104.
- 9 T. Lu and F. Chen, *J. Comput. Chem.* 2012, **33**, 580-592.
- 10 J. Zhang and T. Lu, *Phys. Chem. Chem. Phys.* 2021, **23**, 20323-20328.
- 11 T. Lu and Q. Chen, *J. Comput. Chem.* 2022, **43**, 539-555.
- 12 T. D. Kuhne, M. Iannuzzi, M. Del Ben, V. V. Rybkin, P. Seewald, F. Stein, T. Laino, R. Z. Khaliullin, O. Schutt, F. Schiffmann, D. Golze, J. Wilhelm, S. Chulkov, M. H. Bani-Hashemian, V. Weber, U. Borstnik, M. Taillefumier, A. S. Jakobovits, A. Lazzaro, H. Pabst, T. Muller, R. Schade, M. Guidon, S. Andermatt, N. Holmberg, G. K. Schenter, A. Hehn, A. Bussy, F. Belleflamme, G. Tabacchi, A. Gloss, M. Lass, I. Bethune, C. J. Mundy, C. Plessl, M. Watkins, J. VandeVondele, M. Krack and J. Hutter, *J. Chem. Phys.* 2020, **152**, 194103.
- 13 J. VandeVondele, M. Krack, F. Mohamed, M. Parrinello, T. Chassaing and J. Hutter, *Comput. Phys. Commun.* 2005, **167**, 103-128.
- 14 C. Hartwigsen, S. Goedecker and J. Hutter, *Phys. Rev. B* 1998, **58**, 3641-3662.
- 15 S. Goedecker, *Phys. Rev. B* 1996, **54**, 1703-1710.
- 16 J. VandeVondele and J. Hutter, *J. Chem. Phys.* 2007, **127**, 114105.
- 17 W. Humphrey, A. Dalke and K. Schulten, *J. Mol. Graphics* 1996, **14**, 33-38.
- 18 K. Momma and F. Izumi, *J. Appl. Cryst.* 2011, **44**, 1272-1276.
- 19 A. Rojas and M. A. Camblor, *Angew. Chem. Int. Ed.* 2012, **51**, 3854-3856.

## Author Contributions

- F. Jiao contributed to the synthesis, analyses and the writing the manuscript.  
J. Zhang and Y. Zhao contributed to the structure solution.  
X. S. Cai, H. Li, and Y. N. Xu contributed to the data analysis.  
H. B. Du administrated the work, carried out theoretical calculations, and wrote the manuscript.
